# Supplementary material for: Microstructural changes caused by Ba and Pr doping in nanosized Bi2Ce2O7 leading to interesting optical, magnetic, and catalytic properties
Source: Royal Society of Chemistry journal article supplement (doi:10.1039/d0ce01550d), 2020-12-10
Supplement: d0ce01550d1.pdf [file d0ce01550d1.pdf]

**Electronic Supplementary Information for**  
**Microstructural changes caused by Ba and Pr doping in nanosized  $\text{Bi}_2\text{Ce}_2\text{O}_7$**

**leading to interesting optical, magnetic, and catalytic property**

Shrishti Uniyal, <sup>†</sup> Shalu Atri, <sup>†</sup> Sitharaman Uma, and Rajamani Nagarajan\*

Materials Chemistry Group, Department of Chemistry, University of Delhi

Delhi -110007 INDIA.

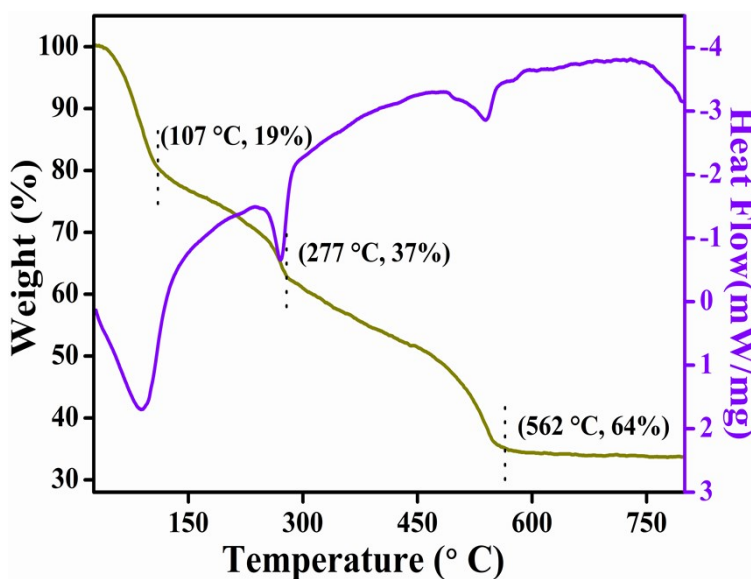

**Fig. S1** TG trace of the co-precipitated hydroxide precursor consisting of 50 mol% each of Bi and Ce.

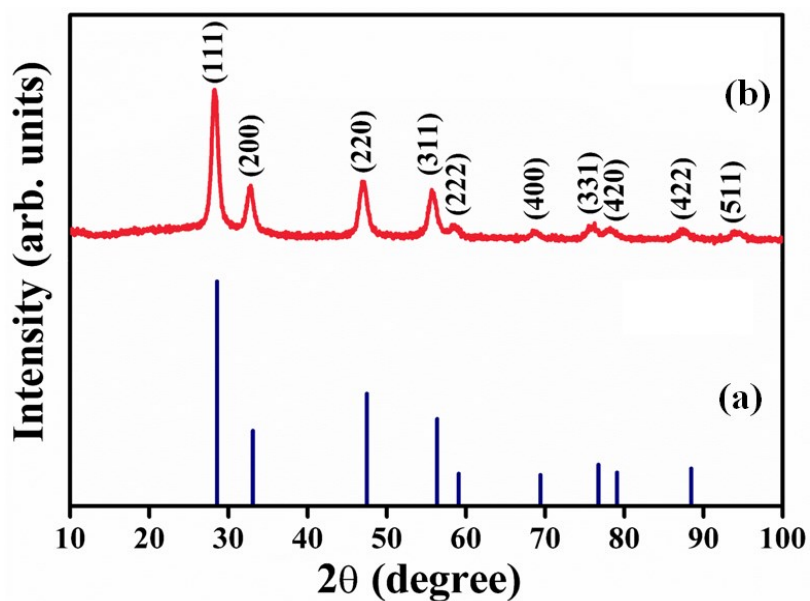

**Fig. S2** (a) Line profile of  $\text{CeO}_2$  (ICSD no. 98-002-9046) and (b) PXRd pattern of the product obtained after the calcination of the precursor consisting 50 *mol%* each of Bi and Ce.

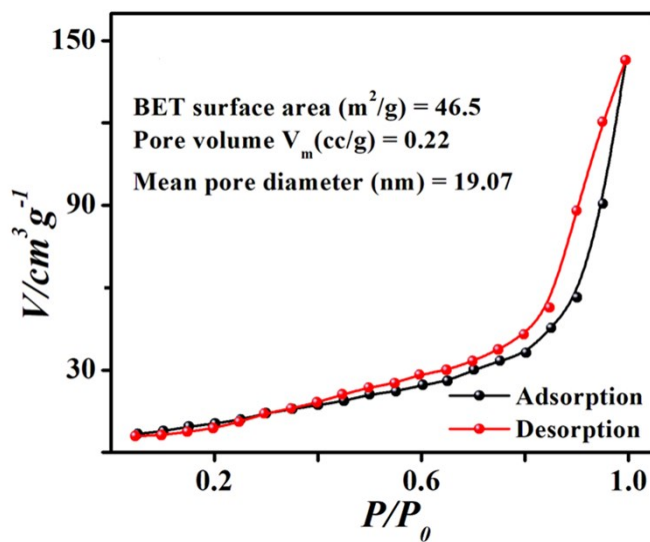

**Fig. S3**  $\text{N}_2$  adsorption-desorption BET surface area isotherms of BCO.

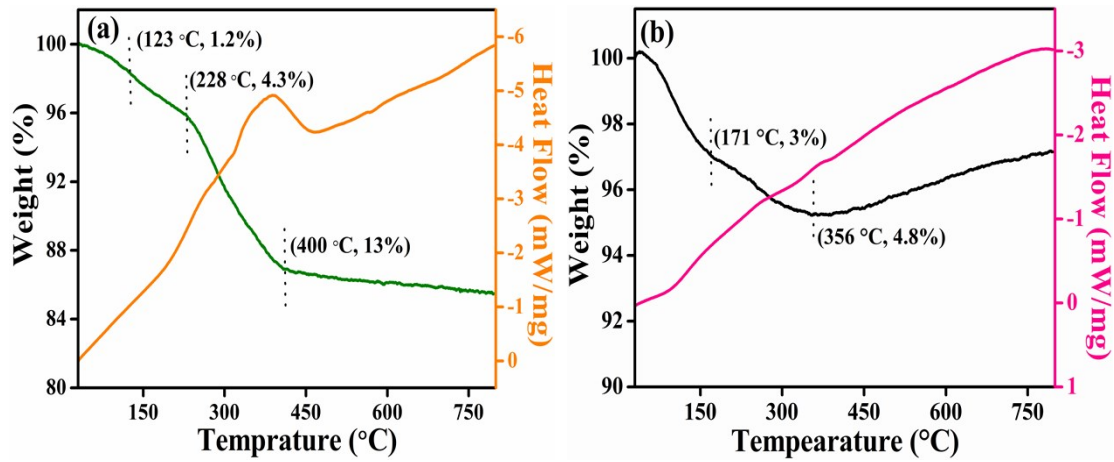

**Fig. S4** TG trace of (a) BCPO and (b) BCBO precursors.

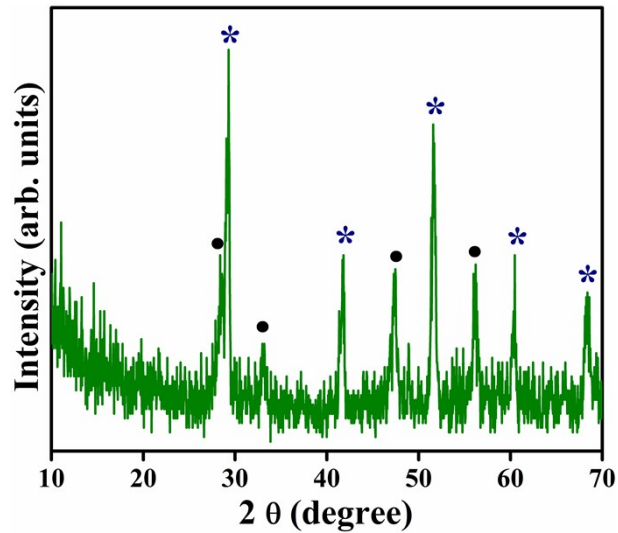

**Fig. S5** PXRD pattern of the product obtained after the calcination of the precursor consisting bismuth substitution by barium in BCO. Reflections marked with ‘circle’ and ‘asterisk’ correspond to  $\text{CeO}_2$  (ICSD no. 98-002-9046) and  $\text{Ba}_2\text{Bi}_2\text{O}_6$  (ICSD no. 98-002-8164), respectively.

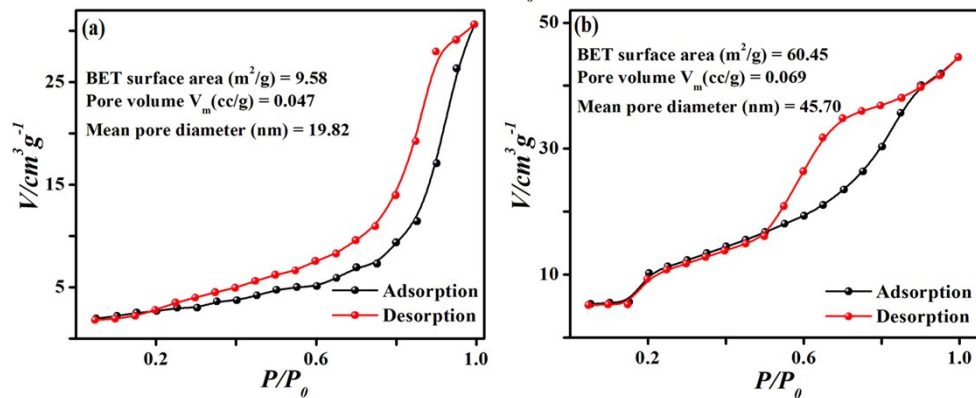

**Fig. S6** N<sub>2</sub> adsorption-desorption BET surface area isotherms of (a) BCPO and (b) BCBO.

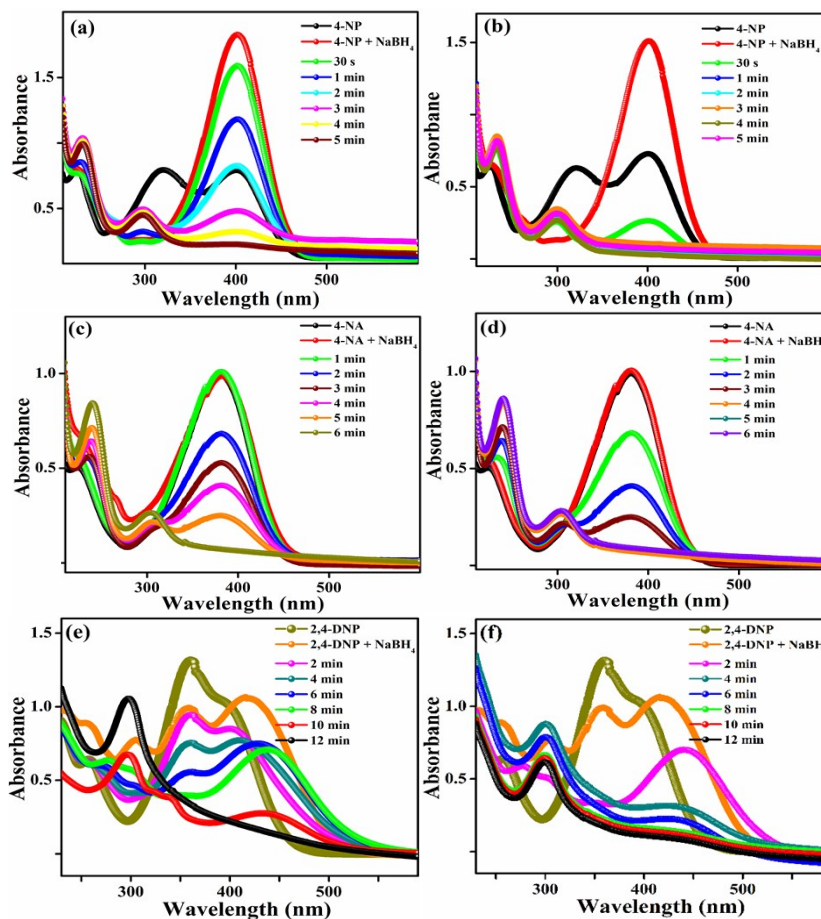

**Fig. S7** Time-dependent UV-visible spectra of 4-NP ((a) & (b)), 4-NA ((c) & (d)), 2, 4 DNP ((e) & (f)) in the presence of 5 mg of NaBH<sub>4</sub> and 5 mg of BCPO and BCBO samples.
